# Supplementary material
Source: publisher figshare collection journal article supplement (https://acs.figshare.com/ndownloader/files/5335318)
Supplement: Supplementary file 1 [file 5335318]

data_1
 
_audit_creation_method            SHELXL-97
_chemical_name_systematic
;
 ?
;
_chemical_name_common             ?
_chemical_melting_point           ?
_chemical_formula_moiety
 '2(C26 H26 N4 O4 Zn), 2(H2 O), 2(O0.5)'          
_chemical_formula_sum
 'C52 H56 N8 O11 Zn2'
_chemical_formula_weight          1099.79
 
loop_
 _atom_type_symbol
 _atom_type_description
 _atom_type_scat_dispersion_real
 _atom_type_scat_dispersion_imag
 _atom_type_scat_source
 'C'  'C'   0.0033   0.0016
 'International Tables Vol C Tables 4.2.6.8 and 6.1.1.4'
 'H'  'H'   0.0000   0.0000
 'International Tables Vol C Tables 4.2.6.8 and 6.1.1.4'
 'N'  'N'   0.0061   0.0033
 'International Tables Vol C Tables 4.2.6.8 and 6.1.1.4'
 'O'  'O'   0.0106   0.0060
 'International Tables Vol C Tables 4.2.6.8 and 6.1.1.4'
 'Zn'  'Zn'   0.2839   1.4301
 'International Tables Vol C Tables 4.2.6.8 and 6.1.1.4'
 
_symmetry_cell_setting            triclinic
_symmetry_space_group_name_H-M    P-1
 
loop_
 _symmetry_equiv_pos_as_xyz
 'x, y, z'
 '-x, -y, -z'
 
_cell_length_a                    9.152(3)
_cell_length_b                    12.333(4)
_cell_length_c                    13.340(6)
_cell_angle_alpha                 65.60(4)
_cell_angle_beta                  71.20(4)
_cell_angle_gamma                 76.03(4)
_cell_volume                      1287.8(10)
_cell_formula_units_Z             1
_cell_measurement_temperature     298
_cell_measurement_reflns_used     ?
_cell_measurement_theta_min       ?
_cell_measurement_theta_max       ?
 
_exptl_crystal_description        block
_exptl_crystal_colour             colourless
_exptl_crystal_size_max           0.27
_exptl_crystal_size_mid           0.20
_exptl_crystal_size_min           0.12
_exptl_crystal_density_meas       ?
_exptl_crystal_density_diffrn     1.418
_exptl_crystal_density_method     'not measured'
_exptl_crystal_F_000              572
_exptl_absorpt_coefficient_mu     0.999
_exptl_absorpt_correction_type  multi-scan
_exptl_absorpt_process_details
;
[c.f. r.h. blessing, acta cryst. (1995), a51, 33-38]
;
_exptl_absorpt_correction_T_min   0.7758
_exptl_absorpt_correction_T_max   0.8918

_diffrn_ambient_temperature       298
_diffrn_radiation_wavelength      0.71073
_diffrn_radiation_type            MoK\a
_diffrn_radiation_source          'fine-focus sealed tube'
_diffrn_radiation_monochromator   graphite
_diffrn_measurement_device_type   'STOE IPDS'
_diffrn_measurement_method        psi-scan
_diffrn_detector_area_resol_mean  ?
_diffrn_standards_number          ?
_diffrn_standards_interval_count  ?
_diffrn_standards_interval_time   ?
_diffrn_standards_decay_%         ?
_diffrn_reflns_number             35597
_diffrn_reflns_av_R_equivalents   0.0810
_diffrn_reflns_av_sigmaI/netI     0.0659
_diffrn_reflns_limit_h_min        -11
_diffrn_reflns_limit_h_max        11
_diffrn_reflns_limit_k_min        -14
_diffrn_reflns_limit_k_max        14
_diffrn_reflns_limit_l_min        -16
_diffrn_reflns_limit_l_max        16
_diffrn_reflns_theta_min          2.01
_diffrn_reflns_theta_max          25.61
_reflns_number_total              4757
_reflns_number_gt                 3346
_reflns_threshold_expression      >2sigma(I)
 
_computing_data_collection        'IPDS software (STOE)'
_computing_cell_refinement        'IPDS software (STOE)'
_computing_data_reduction         'IPDS software (STOE)'
_computing_structure_solution     'SHELXS-97 (Sheldrick, 1997)'
_computing_structure_refinement   'SHELXL-97 (Sheldrick, 1997)'
_computing_molecular_graphics     ?
_computing_publication_material   ?
 
_refine_special_details
;
 Refinement of F^2^ against ALL reflections.  The weighted R-factor wR and
 goodness of fit S are based on F^2^, conventional R-factors R are based
 on F, with F set to zero for negative F^2^. The threshold expression of
 F^2^ > 2sigma(F^2^) is used only for calculating R-factors(gt) etc. and is
 not relevant to the choice of reflections for refinement.  R-factors based
 on F^2^ are statistically about twice as large as those based on F, and R-
 factors based on ALL data will be even larger.
;
 
_refine_ls_structure_factor_coef  Fsqd
_refine_ls_matrix_type            full
_refine_ls_weighting_scheme       calc
_refine_ls_weighting_details
 'calc w=1/[\s^2^(Fo^2^)+(0.0224P)^2^+0.0000P] where P=(Fo^2^+2Fc^2^)/3'
_atom_sites_solution_primary      direct
_atom_sites_solution_secondary    difmap
_atom_sites_solution_hydrogens    mixed
_refine_ls_hydrogen_treatment     mixed
_refine_ls_extinction_method      none
_refine_ls_extinction_coef        ?
_refine_ls_number_reflns          4757
_refine_ls_number_parameters      340
_refine_ls_number_restraints      2
_refine_ls_R_factor_all           0.0528
_refine_ls_R_factor_gt            0.0322
_refine_ls_wR_factor_ref          0.0615
_refine_ls_wR_factor_gt           0.0593
_refine_ls_goodness_of_fit_ref    0.960
_refine_ls_restrained_S_all       0.962
_refine_ls_shift/su_max           0.001
_refine_ls_shift/su_mean          0.000
 
loop_
 _atom_site_label
 _atom_site_type_symbol
 _atom_site_fract_x
 _atom_site_fract_y
 _atom_site_fract_z
 _atom_site_U_iso_or_equiv
 _atom_site_adp_type
 _atom_site_occupancy
 _atom_site_symmetry_multiplicity
 _atom_site_calc_flag
 _atom_site_refinement_flags
 _atom_site_disorder_assembly
 _atom_site_disorder_group
O35 O 0.3081(3) 0.3173(2) 0.1679(3) 0.0996(10) Uani 1 1 d D . .
H35A H 0.402(4) 0.284(3) 0.187(3) 0.119 Uiso 1 1 d D . .
H35B H 0.267(4) 0.261(3) 0.153(3) 0.119 Uiso 1 1 d D . .
O36 O 0.9685(7) 0.8974(6) 0.6084(5) 0.122(2) Uani 0.50 1 d P . .
Zn Zn 1.11664(3) 0.80195(3) -0.07941(2) 0.03147(9) Uani 1 1 d . . .
N1 N 1.1941(2) 0.77760(17) 0.05477(16) 0.0326(5) Uani 1 1 d . . .
C2 C 1.1204(3) 0.8257(2) 0.1327(2) 0.0348(6) Uani 1 1 d . . .
H2 H 1.0243 0.8731 0.1337 0.042 Uiso 1 1 calc R . .
N3 N 1.2001(2) 0.79813(17) 0.20977(16) 0.0350(5) Uani 1 1 d . . .
C4 C 1.3352(3) 0.7290(2) 0.1778(2) 0.0425(7) Uani 1 1 d . . .
H4 H 1.4150 0.6968 0.2148 0.051 Uiso 1 1 calc R . .
C5 C 1.3310(3) 0.7163(2) 0.0841(2) 0.0410(7) Uani 1 1 d . . .
H5 H 1.4079 0.6732 0.0448 0.049 Uiso 1 1 calc R . .
C6 C 1.1561(3) 0.8421(2) 0.3043(2) 0.0432(7) Uani 1 1 d . . .
H6A H 1.0532 0.8874 0.3074 0.052 Uiso 1 1 calc R . .
H6B H 1.2285 0.8959 0.2899 0.052 Uiso 1 1 calc R . .
C7 C 1.1559(3) 0.7406(2) 0.4185(2) 0.0367(6) Uani 1 1 d . . .
C8 C 1.0229(3) 0.6824(2) 0.4801(2) 0.0400(6) Uani 1 1 d . . .
C9 C 1.0182(3) 0.5929(2) 0.5878(2) 0.0451(7) Uani 1 1 d . . .
C10 C 1.1501(4) 0.5600(2) 0.6311(2) 0.0446(7) Uani 1 1 d . . .
C11 C 1.2848(3) 0.6151(2) 0.5680(2) 0.0416(7) Uani 1 1 d . . .
C12 C 1.2879(3) 0.7075(2) 0.4614(2) 0.0392(6) Uani 1 1 d . . .
C13 C 0.8831(3) 0.7135(3) 0.4322(3) 0.0600(8) Uani 1 1 d . . .
H13A H 0.7915 0.7312 0.4862 0.072 Uiso 1 1 calc R . .
H13B H 0.8714 0.6467 0.4172 0.072 Uiso 1 1 calc R . .
H13C H 0.8974 0.7823 0.3628 0.072 Uiso 1 1 calc R . .
C14 C 0.8707(4) 0.5355(3) 0.6567(3) 0.0704(9) Uani 1 1 d . . .
H14A H 0.8970 0.4513 0.6961 0.084 Uiso 1 1 calc R . .
H14B H 0.8085 0.5461 0.6067 0.084 Uiso 1 1 calc R . .
H14C H 0.8130 0.5726 0.7109 0.084 Uiso 1 1 calc R . .
C15 C 1.4280(4) 0.5797(3) 0.6130(3) 0.0659(9) Uani 1 1 d . . .
H15A H 1.4141 0.5102 0.6818 0.079 Uiso 1 1 calc R . .
H15B H 1.4442 0.6448 0.6284 0.079 Uiso 1 1 calc R . .
H15C H 1.5169 0.5618 0.5573 0.079 Uiso 1 1 calc R . .
C16 C 1.4327(3) 0.7689(3) 0.3977(3) 0.0600(8) Uani 1 1 d . . .
H16A H 1.5229 0.7098 0.4018 0.072 Uiso 1 1 calc R . .
H16B H 1.4367 0.8233 0.4312 0.072 Uiso 1 1 calc R . .
H16C H 1.4306 0.8126 0.3195 0.072 Uiso 1 1 calc R . .
C17 C 1.1488(4) 0.4642(2) 0.7481(2) 0.0631(9) Uani 1 1 d . . .
H17A H 1.0561 0.4261 0.7763 0.076 Uiso 1 1 calc R . .
H17B H 1.2366 0.4041 0.7421 0.076 Uiso 1 1 calc R . .
N18 N 1.1546(3) 0.51469(18) 0.82859(17) 0.0406(5) Uani 1 1 d . . .
C19 C 1.1074(3) 0.6274(2) 0.8244(2) 0.0380(6) Uani 1 1 d . . .
H19 H 1.0612 0.6871 0.7692 0.046 Uiso 1 1 calc R . .
N20 N 1.1346(2) 0.64365(17) 0.90807(16) 0.0343(5) Uani 1 1 d . . .
C21 C 1.2030(3) 0.5339(2) 0.9687(2) 0.0416(6) Uani 1 1 d . . .
H21 H 1.2362 0.5174 1.0331 0.050 Uiso 1 1 calc R . .
C22 C 1.2145(3) 0.4547(2) 0.9213(2) 0.0470(7) Uani 1 1 d . . .
H22 H 1.2555 0.3742 0.9465 0.056 Uiso 1 1 calc R . .
O23 O 1.1906(2) 0.92185(16) -0.23320(15) 0.0517(5) Uani 1 1 d . . .
C24 C 1.3348(3) 0.8861(2) -0.2654(2) 0.0405(6) Uani 1 1 d . . .
O25 O 1.4031(2) 0.80346(19) -0.19904(16) 0.0613(6) Uani 1 1 d . . .
C26 C 1.4191(3) 0.9454(2) -0.3865(2) 0.0351(6) Uani 1 1 d . . .
C27 C 1.3400(3) 1.0149(2) -0.4690(2) 0.0448(7) Uani 1 1 d . . .
H27 H 1.2318 1.0255 -0.4489 0.054 Uiso 1 1 calc R . .
C28 C 1.5813(3) 0.9311(2) -0.4191(2) 0.0447(7) Uani 1 1 d . . .
H28 H 1.6370 0.8848 -0.3649 0.054 Uiso 1 1 calc R . .
O29 O 0.90611(18) 0.87059(16) -0.01638(15) 0.0464(5) Uani 1 1 d . . .
C30 C 0.8092(3) 0.8831(2) -0.0715(2) 0.0346(6) Uani 1 1 d . . .
O31 O 0.8402(2) 0.85017(18) -0.15221(17) 0.0560(5) Uani 1 1 d . . .
C32 C 0.6480(2) 0.9424(2) -0.0325(2) 0.0306(6) Uani 1 1 d . . .
C33 C 0.6098(3) 0.9783(2) 0.0591(2) 0.0348(6) Uani 1 1 d . . .
H33 H 0.6834 0.9641 0.0991 0.042 Uiso 1 1 calc R . .
C34 C 0.5376(3) 0.9645(2) -0.0919(2) 0.0367(6) Uani 1 1 d . . .
H34 H 0.5625 0.9409 -0.1539 0.044 Uiso 1 1 calc R . .
 
loop_
 _atom_site_aniso_label
 _atom_site_aniso_U_11
 _atom_site_aniso_U_22
 _atom_site_aniso_U_33
 _atom_site_aniso_U_23
 _atom_site_aniso_U_13
 _atom_site_aniso_U_12
O35 0.117(2) 0.0733(17) 0.131(2) -0.0455(18) -0.079(2) 0.0294(16)
O36 0.131(5) 0.155(5) 0.080(4) -0.044(4) -0.026(4) -0.018(4)
Zn 0.02872(15) 0.03767(17) 0.02448(16) -0.00983(13) -0.00471(12) -0.00340(12)
N1 0.0297(11) 0.0400(12) 0.0264(12) -0.0102(10) -0.0057(9) -0.0067(10)
C2 0.0373(14) 0.0361(14) 0.0299(15) -0.0089(13) -0.0103(12) -0.0059(12)
N3 0.0438(12) 0.0353(12) 0.0255(12) -0.0077(10) -0.0109(10) -0.0074(10)
C4 0.0387(15) 0.0506(17) 0.0368(16) -0.0117(14) -0.0170(13) -0.0007(13)
C5 0.0342(14) 0.0494(17) 0.0374(16) -0.0158(14) -0.0110(13) 0.0006(13)
C6 0.0635(17) 0.0376(15) 0.0345(16) -0.0164(13) -0.0151(14) -0.0072(14)
C7 0.0522(16) 0.0367(14) 0.0264(15) -0.0173(12) -0.0059(13) -0.0096(13)
C8 0.0455(16) 0.0441(16) 0.0371(17) -0.0253(15) -0.0040(14) -0.0071(14)
C9 0.0590(18) 0.0452(17) 0.0354(17) -0.0254(15) 0.0061(15) -0.0191(15)
C10 0.074(2) 0.0349(15) 0.0277(16) -0.0157(13) -0.0076(15) -0.0120(15)
C11 0.0579(17) 0.0413(16) 0.0309(16) -0.0183(14) -0.0133(15) -0.0032(14)
C12 0.0508(16) 0.0420(15) 0.0303(16) -0.0167(14) -0.0073(13) -0.0129(13)
C13 0.0487(17) 0.067(2) 0.072(2) -0.0370(19) -0.0120(17) -0.0035(16)
C14 0.076(2) 0.073(2) 0.057(2) -0.027(2) 0.0126(18) -0.0338(19)
C15 0.074(2) 0.073(2) 0.051(2) -0.0237(18) -0.0252(18) 0.0060(18)
C16 0.065(2) 0.074(2) 0.048(2) -0.0177(17) -0.0153(17) -0.0266(17)
C17 0.117(3) 0.0402(17) 0.0340(18) -0.0118(15) -0.0150(18) -0.0232(18)
N18 0.0614(14) 0.0323(12) 0.0243(12) -0.0074(10) -0.0063(11) -0.0106(11)
C19 0.0478(15) 0.0345(15) 0.0280(15) -0.0081(12) -0.0095(13) -0.0047(13)
N20 0.0353(11) 0.0387(12) 0.0271(12) -0.0109(11) -0.0082(10) -0.0031(10)
C21 0.0510(16) 0.0396(15) 0.0306(15) -0.0052(13) -0.0154(13) -0.0061(13)
C22 0.0638(18) 0.0332(15) 0.0341(16) -0.0035(14) -0.0150(15) -0.0012(14)
O23 0.0404(11) 0.0529(12) 0.0370(11) -0.0062(10) 0.0089(9) -0.0066(9)
C24 0.0438(16) 0.0430(16) 0.0333(16) -0.0133(14) -0.0018(14) -0.0151(14)
O25 0.0517(12) 0.0772(15) 0.0352(12) 0.0015(11) -0.0088(10) -0.0162(11)
C26 0.0380(14) 0.0353(14) 0.0266(15) -0.0104(12) 0.0020(12) -0.0106(12)
C27 0.0326(14) 0.0536(18) 0.0369(17) -0.0138(15) 0.0020(13) -0.0049(13)
C28 0.0388(15) 0.0506(17) 0.0315(16) -0.0061(14) -0.0044(13) -0.0049(13)
O29 0.0271(9) 0.0635(13) 0.0484(12) -0.0250(11) -0.0115(9) 0.0056(9)
C30 0.0315(13) 0.0296(14) 0.0334(16) -0.0055(13) -0.0016(12) -0.0077(11)
O31 0.0416(11) 0.0745(14) 0.0566(13) -0.0401(12) -0.0097(10) 0.0102(10)
C32 0.0232(12) 0.0301(13) 0.0326(15) -0.0079(12) -0.0020(11) -0.0062(11)
C33 0.0269(12) 0.0413(15) 0.0337(15) -0.0100(13) -0.0085(12) -0.0054(12)
C34 0.0320(13) 0.0438(15) 0.0337(15) -0.0172(13) -0.0017(12) -0.0070(12)
 
_geom_special_details
;
 All esds (except the esd in the dihedral angle between two l.s. planes)
 are estimated using the full covariance matrix.  The cell esds are taken
 into account individually in the estimation of esds in distances, angles
 and torsion angles; correlations between esds in cell parameters are only
 used when they are defined by crystal symmetry.  An approximate (isotropic)
 treatment of cell esds is used for estimating esds involving l.s. planes.
;
 
loop_
 _geom_bond_atom_site_label_1
 _geom_bond_atom_site_label_2
 _geom_bond_distance
 _geom_bond_site_symmetry_2
 _geom_bond_publ_flag
O35 H35A 0.92(3) . ?
O35 H35B 0.97(3) . ?
Zn O29 1.9729(18) . ?
Zn O23 1.984(2) . ?
Zn N20 1.991(2) 1_554 ?
Zn N1 2.017(2) . ?
N1 C2 1.324(3) . ?
N1 C5 1.381(3) . ?
C2 N3 1.334(3) . ?
C2 H2 0.9300 . ?
N3 C4 1.374(3) . ?
N3 C6 1.476(3) . ?
C4 C5 1.336(3) . ?
C4 H4 0.9300 . ?
C5 H5 0.9300 . ?
C6 C7 1.520(4) . ?
C6 H6A 0.9700 . ?
C6 H6B 0.9700 . ?
C7 C8 1.401(4) . ?
C7 C12 1.404(3) . ?
C8 C9 1.399(4) . ?
C8 C13 1.510(3) . ?
C9 C10 1.405(4) . ?
C9 C14 1.514(4) . ?
C10 C11 1.397(4) . ?
C10 C17 1.518(4) . ?
C11 C12 1.404(4) . ?
C11 C15 1.511(4) . ?
C12 C16 1.510(4) . ?
C13 H13A 0.9599 . ?
C13 H13B 0.9599 . ?
C13 H13C 0.9599 . ?
C14 H14A 0.9599 . ?
C14 H14B 0.9599 . ?
C14 H14C 0.9599 . ?
C15 H15A 0.9599 . ?
C15 H15B 0.9599 . ?
C15 H15C 0.9599 . ?
C16 H16A 0.9599 . ?
C16 H16B 0.9599 . ?
C16 H16C 0.9599 . ?
C17 N18 1.466(3) . ?
C17 H17A 0.9600 . ?
C17 H17B 0.9600 . ?
N18 C19 1.336(3) . ?
N18 C22 1.365(3) . ?
C19 N20 1.318(3) . ?
C19 H19 0.9300 . ?
N20 C21 1.375(3) . ?
N20 Zn 1.991(2) 1_556 ?
C21 C22 1.336(3) . ?
C21 H21 0.9300 . ?
C22 H22 0.9300 . ?
O23 C24 1.277(3) . ?
C24 O25 1.232(3) . ?
C24 C26 1.494(4) . ?
C26 C27 1.379(3) . ?
C26 C28 1.395(3) . ?
C27 C28 1.381(4) 2_874 ?
C27 H27 0.9300 . ?
C28 C27 1.381(4) 2_874 ?
C28 H28 0.9300 . ?
O29 C30 1.270(3) . ?
C30 O31 1.230(3) . ?
C30 C32 1.510(3) . ?
C32 C33 1.382(3) . ?
C32 C34 1.389(3) . ?
C33 C34 1.387(3) 2_675 ?
C33 H33 0.9300 . ?
C34 C33 1.387(3) 2_675 ?
C34 H34 0.9300 . ?
 
loop_
 _geom_angle_atom_site_label_1
 _geom_angle_atom_site_label_2
 _geom_angle_atom_site_label_3
 _geom_angle
 _geom_angle_site_symmetry_1
 _geom_angle_site_symmetry_3
 _geom_angle_publ_flag
H35A O35 H35B 110(3) . . ?
O29 Zn O23 105.91(9) . . ?
O29 Zn N20 116.57(9) . 1_554 ?
O23 Zn N20 109.00(9) . 1_554 ?
O29 Zn N1 93.29(8) . . ?
O23 Zn N1 122.73(9) . . ?
N20 Zn N1 109.01(8) 1_554 . ?
C2 N1 C5 105.17(19) . . ?
C2 N1 Zn 124.53(15) . . ?
C5 N1 Zn 130.23(16) . . ?
N1 C2 N3 112.0(2) . . ?
N1 C2 H2 124.0 . . ?
N3 C2 H2 124.0 . . ?
C2 N3 C4 106.15(19) . . ?
C2 N3 C6 126.2(2) . . ?
C4 N3 C6 127.51(19) . . ?
C5 C4 N3 107.6(2) . . ?
C5 C4 H4 126.2 . . ?
N3 C4 H4 126.2 . . ?
C4 C5 N1 109.1(2) . . ?
C4 C5 H5 125.4 . . ?
N1 C5 H5 125.4 . . ?
N3 C6 C7 112.43(19) . . ?
N3 C6 H6A 109.1 . . ?
C7 C6 H6A 109.1 . . ?
N3 C6 H6B 109.1 . . ?
C7 C6 H6B 109.1 . . ?
H6A C6 H6B 107.8 . . ?
C8 C7 C12 120.9(2) . . ?
C8 C7 C6 119.4(2) . . ?
C12 C7 C6 119.7(2) . . ?
C9 C8 C7 120.1(2) . . ?
C9 C8 C13 118.7(3) . . ?
C7 C8 C13 121.3(2) . . ?
C8 C9 C10 119.1(3) . . ?
C8 C9 C14 119.7(3) . . ?
C10 C9 C14 121.2(3) . . ?
C11 C10 C9 120.9(2) . . ?
C11 C10 C17 118.5(3) . . ?
C9 C10 C17 120.6(3) . . ?
C10 C11 C12 120.0(2) . . ?
C10 C11 C15 121.5(2) . . ?
C12 C11 C15 118.5(3) . . ?
C7 C12 C11 119.0(3) . . ?
C7 C12 C16 122.2(2) . . ?
C11 C12 C16 118.7(2) . . ?
C8 C13 H13A 109.5 . . ?
C8 C13 H13B 109.5 . . ?
H13A C13 H13B 109.5 . . ?
C8 C13 H13C 109.5 . . ?
H13A C13 H13C 109.5 . . ?
H13B C13 H13C 109.5 . . ?
C9 C14 H14A 109.5 . . ?
C9 C14 H14B 109.5 . . ?
H14A C14 H14B 109.5 . . ?
C9 C14 H14C 109.5 . . ?
H14A C14 H14C 109.5 . . ?
H14B C14 H14C 109.5 . . ?
C11 C15 H15A 109.5 . . ?
C11 C15 H15B 109.5 . . ?
H15A C15 H15B 109.5 . . ?
C11 C15 H15C 109.5 . . ?
H15A C15 H15C 109.5 . . ?
H15B C15 H15C 109.5 . . ?
C12 C16 H16A 109.5 . . ?
C12 C16 H16B 109.5 . . ?
H16A C16 H16B 109.5 . . ?
C12 C16 H16C 109.5 . . ?
H16A C16 H16C 109.5 . . ?
H16B C16 H16C 109.5 . . ?
N18 C17 C10 111.7(2) . . ?
N18 C17 H17A 109.3 . . ?
C10 C17 H17A 109.3 . . ?
N18 C17 H17B 109.3 . . ?
C10 C17 H17B 109.3 . . ?
H17A C17 H17B 107.9 . . ?
C19 N18 C22 106.9(2) . . ?
C19 N18 C17 127.3(2) . . ?
C22 N18 C17 125.8(2) . . ?
N20 C19 N18 111.6(2) . . ?
N20 C19 H19 124.2 . . ?
N18 C19 H19 124.2 . . ?
C19 N20 C21 105.1(2) . . ?
C19 N20 Zn 125.23(17) . 1_556 ?
C21 N20 Zn 128.69(16) . 1_556 ?
C22 C21 N20 109.7(2) . . ?
C22 C21 H21 125.1 . . ?
N20 C21 H21 125.1 . . ?
C21 C22 N18 106.7(2) . . ?
C21 C22 H22 126.6 . . ?
N18 C22 H22 126.6 . . ?
C24 O23 Zn 105.27(17) . . ?
O25 C24 O23 121.1(3) . . ?
O25 C24 C26 120.4(2) . . ?
O23 C24 C26 118.5(2) . . ?
C27 C26 C28 118.1(2) . . ?
C27 C26 C24 121.5(2) . . ?
C28 C26 C24 120.3(2) . . ?
C26 C27 C28 121.2(2) . 2_874 ?
C26 C27 H27 119.4 . . ?
C28 C27 H27 119.4 2_874 . ?
C27 C28 C26 120.7(2) 2_874 . ?
C27 C28 H28 119.7 2_874 . ?
C26 C28 H28 119.7 . . ?
C30 O29 Zn 113.07(15) . . ?
O31 C30 O29 123.8(2) . . ?
O31 C30 C32 120.2(2) . . ?
O29 C30 C32 116.0(2) . . ?
C33 C32 C34 119.4(2) . . ?
C33 C32 C30 121.1(2) . . ?
C34 C32 C30 119.4(2) . . ?
C32 C33 C34 120.4(2) . 2_675 ?
C32 C33 H33 119.8 . . ?
C34 C33 H33 119.8 2_675 . ?
C33 C34 C32 120.2(2) 2_675 . ?
C33 C34 H34 119.9 2_675 . ?
C32 C34 H34 119.9 . . ?
 
loop_
 _geom_hbond_atom_site_label_D
 _geom_hbond_atom_site_label_H
 _geom_hbond_atom_site_label_A
 _geom_hbond_distance_DH
 _geom_hbond_distance_HA
 _geom_hbond_distance_DA
 _geom_hbond_angle_DHA
 _geom_hbond_site_symmetry_A
O35 H35A O25  0.92(3) 1.87(3) 2.770(3) 165(4) 2_765
O35 H35B O31  0.97(3) 1.88(3) 2.836(4) 169(4) 2_665
C14 H14C O35  0.96 2.37 3.326(4) 172.9 2_666
C21 H21 O35  0.93 2.46 3.109(4) 126.6 1_656

 
_diffrn_measured_fraction_theta_max    0.982
_diffrn_reflns_theta_full              25.60
_diffrn_measured_fraction_theta_full   0.982
_refine_diff_density_max    0.296
_refine_diff_density_min   -0.248
_refine_diff_density_rms    0.053
#===END

data_2
 
_audit_creation_method            SHELXL-97
_chemical_name_systematic
;
 ?
;
_chemical_name_common             ?
_chemical_melting_point           ?
_chemical_formula_moiety
 'C17 H15 N2 O4 Zn, C4 H3 O2'
_chemical_formula_sum
 'C21 H18 N2 O6 Zn'
_chemical_formula_weight          459.74
 
loop_
 _atom_type_symbol
 _atom_type_description
 _atom_type_scat_dispersion_real
 _atom_type_scat_dispersion_imag
 _atom_type_scat_source
 'C'  'C'   0.0033   0.0016
 'International Tables Vol C Tables 4.2.6.8 and 6.1.1.4'
 'H'  'H'   0.0000   0.0000
 'International Tables Vol C Tables 4.2.6.8 and 6.1.1.4'
 'N'  'N'   0.0061   0.0033
 'International Tables Vol C Tables 4.2.6.8 and 6.1.1.4'
 'O'  'O'   0.0106   0.0060
 'International Tables Vol C Tables 4.2.6.8 and 6.1.1.4'
 'Zn'  'Zn'   0.2839   1.4301
 'International Tables Vol C Tables 4.2.6.8 and 6.1.1.4'
 
_symmetry_cell_setting            Triclinic
_symmetry_space_group_name_H-M    P-1
 
loop_
 _symmetry_equiv_pos_as_xyz
 'x, y, z'
 '-x, -y, -z'
 
_cell_length_a                    8.473(3)
_cell_length_b                    10.154(3)
_cell_length_c                    13.397(3)
_cell_angle_alpha                 68.21(3)
_cell_angle_beta                  78.64(3)
_cell_angle_gamma                 77.46(4)
_cell_volume                      1036.1(6)
_cell_formula_units_Z             2
_cell_measurement_temperature     298
 
_exptl_crystal_description        block
_exptl_crystal_colour             colourless
_exptl_crystal_size_max           0.34
_exptl_crystal_size_mid           0.15
_exptl_crystal_size_min           0.10
_exptl_crystal_density_meas       ?
_exptl_crystal_density_diffrn     1.474
_exptl_crystal_density_method     'not measured'
_exptl_crystal_F_000              472
_exptl_absorpt_coefficient_mu     1.225
_exptl_absorpt_correction_type    multi-scan
_exptl_absorpt_process_details
;
[c.f. r.h. blessing, acta cryst. (1995), a51, 33-38]
;
_exptl_absorpt_correction_T_min   0.8356
_exptl_absorpt_correction_T_max   0.8850

_diffrn_ambient_temperature       298
_diffrn_radiation_wavelength      0.71073
_diffrn_radiation_type            MoK\a
_diffrn_radiation_source          'fine-focus sealed tube'
_diffrn_radiation_monochromator   graphite
_diffrn_measurement_device_type   'STOE IPDS'
_diffrn_measurement_method        psi-scan
_diffrn_detector_area_resol_mean  ?
_diffrn_standards_number          ?
_diffrn_standards_interval_count  ?
_diffrn_standards_interval_time   ?
_diffrn_standards_decay_%         ?
_diffrn_reflns_number             24605
_diffrn_reflns_av_R_equivalents   0.0618
_diffrn_reflns_av_sigmaI/netI     0.0595
_diffrn_reflns_limit_h_min        -11
_diffrn_reflns_limit_h_max        11
_diffrn_reflns_limit_k_min        -13
_diffrn_reflns_limit_k_max        13
_diffrn_reflns_limit_l_min        -17
_diffrn_reflns_limit_l_max        17
_diffrn_reflns_theta_min          2.48
_diffrn_reflns_theta_max          27.60

_reflns_number_total              4804
_reflns_number_gt                 3425
_reflns_threshold_expression      >2sigma(I)
 
_computing_data_collection        'IPDS software (STOE)'
_computing_cell_refinement        'IPDS software (STOE)'
_computing_data_reduction         'IPDS software (STOE)'
_computing_structure_solution     'SHELXS-97 (Sheldrick, 1997)'
_computing_structure_refinement   'SHELXL-97 (Sheldrick, 1997)'
_computing_molecular_graphics     ?
_computing_publication_material   ?
 
_refine_special_details
;
 Refinement of F^2^ against ALL reflections.  The weighted R-factor wR and
 goodness of fit S are based on F^2^, conventional R-factors R are based
 on F, with F set to zero for negative F^2^. The threshold expression of
 F^2^ > 2sigma(F^2^) is used only for calculating R-factors(gt) etc. and is
 not relevant to the choice of reflections for refinement.  R-factors based
 on F^2^ are statistically about twice as large as those based on F, and R-
 factors based on ALL data will be even larger.
;
 
_refine_ls_structure_factor_coef  Fsqd
_refine_ls_matrix_type            full
_refine_ls_weighting_scheme       calc
_refine_ls_weighting_details
 'calc w=1/[\s^2^(Fo^2^)+(0.0235P)^2^+0.0000P] where P=(Fo^2^+2Fc^2^)/3'
_atom_sites_solution_primary      direct
_atom_sites_solution_secondary    difmap
_atom_sites_solution_hydrogens    mixed
_refine_ls_hydrogen_treatment     mixed
_refine_ls_extinction_method      none
_refine_ls_extinction_coef        ?
_refine_ls_number_reflns          4804
_refine_ls_number_parameters      274
_refine_ls_number_restraints      0
_refine_ls_R_factor_all           0.0516
_refine_ls_R_factor_gt            0.0304
_refine_ls_wR_factor_ref          0.0592
_refine_ls_wR_factor_gt           0.0569
_refine_ls_goodness_of_fit_ref    0.967
_refine_ls_restrained_S_all       0.967
_refine_ls_shift/su_max           0.001
_refine_ls_shift/su_mean          0.000
 
loop_
 _atom_site_label
 _atom_site_type_symbol
 _atom_site_fract_x
 _atom_site_fract_y
 _atom_site_fract_z
 _atom_site_U_iso_or_equiv
 _atom_site_adp_type
 _atom_site_occupancy
 _atom_site_symmetry_multiplicity
 _atom_site_calc_flag
 _atom_site_refinement_flags
 _atom_site_disorder_assembly
 _atom_site_disorder_group
Zn Zn 0.05663(3) 0.56485(2) 0.841776(19) 0.02632(7) Uani 1 1 d . . .
N1 N -0.1657(2) 0.65753(19) 0.80511(14) 0.0380(4) Uani 1 1 d . . .
C2 C -0.2735(3) 0.7338(3) 0.8562(2) 0.0536(7) Uani 1 1 d . . .
H2 H -0.2552 0.7477 0.9175 0.064 Uiso 1 1 calc R . .
N3 N -0.4083(2) 0.7880(2) 0.81237(15) 0.0420(5) Uani 1 1 d . . .
C4 C -0.3872(4) 0.7478(5) 0.7252(3) 0.1077(16) Uani 1 1 d . . .
H4 H -0.4615 0.7709 0.6763 0.129 Uiso 1 1 calc R . .
C5 C -0.2385(4) 0.6679(4) 0.7218(3) 0.0922(13) Uani 1 1 d . . .
H5 H -0.1930 0.6261 0.6694 0.111 Uiso 1 1 calc R . .
C6 C -0.5566(3) 0.8738(3) 0.8504(2) 0.0490(6) Uani 1 1 d . . .
H6A H -0.6388 0.8136 0.8855 0.059 Uiso 1 1 calc R . .
H6B H -0.5980 0.9500 0.7891 0.059 Uiso 1 1 calc R . .
C7 C -0.5230(3) 0.9374(2) 0.92895(19) 0.0418(6) Uani 1 1 d . . .
C8 C -0.4759(3) 1.0729(3) 0.88778(19) 0.0454(6) Uani 1 1 d . . .
C9 C -0.5456(3) 0.8627(2) 1.0404(2) 0.0446(6) Uani 1 1 d . . .
C10 C -0.4435(4) 1.1486(3) 0.7671(2) 0.0746(9) Uani 1 1 d . . .
H10A H -0.4331 1.0813 0.7304 0.089 Uiso 1 1 calc R . .
H10B H -0.3445 1.1882 0.7502 0.089 Uiso 1 1 calc R . .
H10C H -0.5325 1.2245 0.7438 0.089 Uiso 1 1 calc R . .
C11 C -0.5865(4) 0.7113(3) 1.0857(2) 0.0653(8) Uani 1 1 d . . .
H11A H -0.5863 0.6786 1.0270 0.078 Uiso 1 1 calc R . .
H11B H -0.6923 0.7112 1.1276 0.078 Uiso 1 1 calc R . .
H11C H -0.5065 0.6485 1.1310 0.078 Uiso 1 1 calc R . .
O12 O 0.10287(18) 0.68771(14) 0.91435(11) 0.0366(4) Uani 1 1 d . . .
C13 C 0.0135(2) 0.71804(19) 0.99246(15) 0.0267(4) Uani 1 1 d . . .
O14 O -0.07341(19) 0.63648(14) 1.06617(12) 0.0391(4) Uani 1 1 d . . .
C15 C 0.0061(2) 0.86516(18) 0.99596(15) 0.0240(4) Uani 1 1 d . . .
C16 C 0.0463(2) 0.97632(19) 0.90227(15) 0.0286(5) Uani 1 1 d . . .
H16 H 0.0764 0.9600 0.8367 0.034 Uiso 1 1 calc R . .
C17 C 0.0418(3) 1.1114(2) 0.90555(15) 0.0296(5) Uani 1 1 d . . .
H17 H 0.0704 1.1859 0.8428 0.035 Uiso 1 1 calc R . .
O18 O 0.24455(18) 0.57106(15) 0.73216(11) 0.0383(4) Uani 1 1 d . . .
C19 C 0.2278(3) 0.5116(2) 0.66656(16) 0.0325(5) Uani 1 1 d . . .
O20 O 0.1040(2) 0.46161(18) 0.67306(12) 0.0458(4) Uani 1 1 d . . .
C21 C 0.3685(3) 0.5065(2) 0.57965(15) 0.0302(5) Uani 1 1 d . . .
C22 C 0.3491(3) 0.4807(2) 0.48900(17) 0.0420(6) Uani 1 1 d . . .
H22 H 0.2477 0.4674 0.4811 0.050 Uiso 1 1 calc R . .
C23 C 0.5199(3) 0.5253(2) 0.59011(16) 0.0405(5) Uani 1 1 d . . .
H23 H 0.5342 0.5423 0.6511 0.049 Uiso 1 1 calc R . .
O24 O -0.0193(3) 0.7148(2) 0.40352(17) 0.0654(6) Uani 1 1 d . . .
H24 H -0.058(4) 0.668(3) 0.378(2) 0.079 Uiso 1 1 d . . .
C25 C -0.1156(4) 0.8361(3) 0.40132(19) 0.0502(6) Uani 1 1 d . . .
O26 O -0.2406(3) 0.8756(2) 0.36328(18) 0.0782(7) Uani 1 1 d . . .
C27 C -0.0529(3) 0.9202(2) 0.45201(19) 0.0478(6) Uani 1 1 d . . .
C28 C 0.0948(4) 0.8749(3) 0.4912(2) 0.0649(8) Uani 1 1 d . . .
H28 H 0.1598 0.7912 0.4849 0.078 Uiso 1 1 calc R . .
C29 C 0.1471(4) 0.9533(3) 0.5398(3) 0.0688(9) Uani 1 1 d . . .
H29 H 0.2464 0.9210 0.5674 0.083 Uiso 1 1 calc R . .
 
loop_
 _atom_site_aniso_label
 _atom_site_aniso_U_11
 _atom_site_aniso_U_22
 _atom_site_aniso_U_33
 _atom_site_aniso_U_23
 _atom_site_aniso_U_13
 _atom_site_aniso_U_12
Zn 0.02835(13) 0.02449(11) 0.02847(12) -0.01613(9) 0.00749(9) -0.00641(9)
N1 0.0318(10) 0.0473(11) 0.0421(10) -0.0275(9) -0.0035(8) -0.0001(8)
C2 0.0372(14) 0.0807(18) 0.0561(15) -0.0474(14) -0.0171(12) 0.0165(13)
N3 0.0328(11) 0.0508(11) 0.0516(12) -0.0300(10) -0.0139(9) 0.0043(9)
C4 0.074(2) 0.169(4) 0.129(3) -0.122(3) -0.061(2) 0.051(2)
C5 0.062(2) 0.144(3) 0.113(3) -0.107(3) -0.0392(19) 0.034(2)
C6 0.0310(13) 0.0594(15) 0.0621(15) -0.0329(13) -0.0140(11) 0.0109(12)
C7 0.0311(13) 0.0452(13) 0.0505(14) -0.0247(12) -0.0120(11) 0.0124(11)
C8 0.0373(13) 0.0493(14) 0.0464(13) -0.0193(12) -0.0090(11) 0.0081(11)
C9 0.0339(13) 0.0411(13) 0.0573(15) -0.0207(12) -0.0083(11) 0.0063(11)
C10 0.094(3) 0.074(2) 0.0539(17) -0.0172(15) -0.0137(16) -0.0137(18)
C11 0.0629(19) 0.0544(16) 0.077(2) -0.0197(15) -0.0153(16) -0.0063(14)
O12 0.0396(9) 0.0337(7) 0.0470(8) -0.0300(7) 0.0095(7) -0.0115(7)
C13 0.0284(11) 0.0233(9) 0.0327(11) -0.0155(9) -0.0037(9) -0.0027(9)
O14 0.0508(10) 0.0227(7) 0.0427(8) -0.0135(7) 0.0079(7) -0.0121(7)
C15 0.0246(10) 0.0200(9) 0.0304(10) -0.0137(8) -0.0002(8) -0.0035(8)
C16 0.0374(12) 0.0270(10) 0.0262(10) -0.0177(8) 0.0027(9) -0.0056(9)
C17 0.0407(13) 0.0226(9) 0.0241(10) -0.0087(8) 0.0034(9) -0.0077(9)
O18 0.0403(9) 0.0464(8) 0.0345(8) -0.0275(7) 0.0154(6) -0.0137(7)
C19 0.0354(13) 0.0323(10) 0.0276(10) -0.0142(9) 0.0060(9) -0.0025(10)
O20 0.0377(10) 0.0626(10) 0.0458(9) -0.0334(8) 0.0141(7) -0.0169(8)
C21 0.0344(12) 0.0301(10) 0.0248(10) -0.0140(8) 0.0066(8) -0.0038(9)
C22 0.0348(13) 0.0625(15) 0.0360(12) -0.0278(11) 0.0058(10) -0.0124(11)
C23 0.0443(14) 0.0578(14) 0.0274(11) -0.0265(10) 0.0083(10) -0.0149(11)
O24 0.0684(13) 0.0621(12) 0.0854(14) -0.0431(11) -0.0220(11) -0.0077(10)
C25 0.0611(18) 0.0493(15) 0.0401(14) -0.0090(12) -0.0135(13) -0.0136(13)
O26 0.0860(16) 0.0704(13) 0.0956(16) -0.0346(12) -0.0522(14) -0.0004(12)
C27 0.0585(17) 0.0445(13) 0.0440(13) -0.0148(11) -0.0191(12) -0.0051(12)
C28 0.069(2) 0.0546(16) 0.084(2) -0.0359(15) -0.0330(17) 0.0067(15)
C29 0.070(2) 0.0591(17) 0.092(2) -0.0337(16) -0.0468(18) 0.0070(15)
 
_geom_special_details
;
 All esds (except the esd in the dihedral angle between two l.s. planes)
 are estimated using the full covariance matrix.  The cell esds are taken
 into account individually in the estimation of esds in distances, angles
 and torsion angles; correlations between esds in cell parameters are only
 used when they are defined by crystal symmetry.  An approximate (isotropic)
 treatment of cell esds is used for estimating esds involving l.s. planes.
;
 
loop_
 _geom_bond_atom_site_label_1
 _geom_bond_atom_site_label_2
 _geom_bond_distance
 _geom_bond_site_symmetry_2
 _geom_bond_publ_flag
Zn O18 1.9363(15) . ?
Zn O14 1.9472(16) 2_567 ?
Zn O12 1.9794(13) . ?
Zn N1 1.9819(19) . ?
N1 C2 1.320(3) . ?
N1 C5 1.339(3) . ?
C2 N3 1.305(3) . ?
C2 H2 0.9300 . ?
N3 C4 1.342(3) . ?
N3 C6 1.483(3) . ?
C4 C5 1.345(4) . ?
C4 H4 0.9300 . ?
C5 H5 0.9300 . ?
C6 C7 1.519(3) . ?
C6 H6A 0.9600 . ?
C6 H6B 0.9600 . ?
C7 C8 1.395(4) . ?
C7 C9 1.397(3) . ?
C8 C9 1.405(3) 2_477 ?
C8 C10 1.508(4) . ?
C9 C11 1.519(4) . ?
C10 H10A 0.9599 . ?
C10 H10B 0.9599 . ?
C10 H10C 0.9599 . ?
C11 H11A 0.9599 . ?
C11 H11B 0.9599 . ?
C11 H11C 0.9599 . ?
O12 C13 1.261(2) . ?
C13 O14 1.255(2) . ?
C13 C15 1.499(2) . ?
C15 C16 1.383(3) . ?
C15 C17 1.394(2) 2_577 ?
C16 H16 0.9300 . ?
C17 H17 0.9300 . ?
O18 C19 1.280(2) . ?
C19 O20 1.236(3) . ?
C19 C21 1.500(3) . ?
C21 C23 1.378(3) . ?
C21 C22 1.380(3) . ?
C22 C23 1.384(3) 2_666 ?
C22 H22 0.9300 . ?
C23 C22 1.384(3) 2_666 ?
C23 H23 0.9300 . ?
O24 C25 1.315(3) . ?
O24 H24 0.82(3) . ?
C25 O26 1.192(3) . ?
C25 C27 1.497(3) . ?
C27 C28 1.372(4) . ?
C27 C29 1.386(3) 2_576 ?
C28 C29 1.381(4) . ?
C28 H28 0.9300 . ?
C29 H29 0.9300 . ?
 
loop_
 _geom_angle_atom_site_label_1
 _geom_angle_atom_site_label_2
 _geom_angle_atom_site_label_3
 _geom_angle
 _geom_angle_site_symmetry_1
 _geom_angle_site_symmetry_3
 _geom_angle_publ_flag
O18 Zn O14 104.28(7) . 2_567 ?
O18 Zn O12 101.35(7) . . ?
O14 Zn O12 112.50(6) 2_567 . ?
O18 Zn N1 122.34(7) . . ?
O14 Zn N1 114.49(8) 2_567 . ?
O12 Zn N1 101.15(7) . . ?
C2 N1 C5 103.75(19) . . ?
C2 N1 Zn 126.12(15) . . ?
C5 N1 Zn 129.98(15) . . ?
N3 C2 N1 113.56(19) . . ?
N3 C2 H2 123.2 . . ?
N1 C2 H2 123.2 . . ?
C2 N3 C4 105.63(19) . . ?
C2 N3 C6 128.07(18) . . ?
C4 N3 C6 126.3(2) . . ?
N3 C4 C5 107.2(2) . . ?
N3 C4 H4 126.4 . . ?
C5 C4 H4 126.4 . . ?
N1 C5 C4 109.8(2) . . ?
N1 C5 H5 125.1 . . ?
C4 C5 H5 125.1 . . ?
N3 C6 C7 112.15(18) . . ?
N3 C6 H6A 109.2 . . ?
C7 C6 H6A 109.2 . . ?
N3 C6 H6B 109.2 . . ?
C7 C6 H6B 109.2 . . ?
H6A C6 H6B 107.9 . . ?
C8 C7 C9 121.2(2) . . ?
C8 C7 C6 118.8(2) . . ?
C9 C7 C6 119.9(2) . . ?
C7 C8 C9 119.5(2) . 2_477 ?
C7 C8 C10 120.5(2) . . ?
C9 C8 C10 119.9(3) 2_477 . ?
C7 C9 C8 119.2(2) . 2_477 ?
C7 C9 C11 121.5(2) . . ?
C8 C9 C11 119.2(2) 2_477 . ?
C8 C10 H10A 109.5 . . ?
C8 C10 H10B 109.5 . . ?
H10A C10 H10B 109.5 . . ?
C8 C10 H10C 109.5 . . ?
H10A C10 H10C 109.5 . . ?
H10B C10 H10C 109.5 . . ?
C9 C11 H11A 109.5 . . ?
C9 C11 H11B 109.5 . . ?
H11A C11 H11B 109.5 . . ?
C9 C11 H11C 109.5 . . ?
H11A C11 H11C 109.5 . . ?
H11B C11 H11C 109.5 . . ?
C13 O12 Zn 125.73(14) . . ?
O14 C13 O12 125.34(17) . . ?
O14 C13 C15 117.15(16) . . ?
O12 C13 C15 117.48(18) . . ?
C13 O14 Zn 138.43(13) . 2_567 ?
C16 C15 C17 120.46(16) . 2_577 ?
C16 C15 C13 120.21(15) . . ?
C17 C15 C13 119.33(17) 2_577 . ?
C17 C16 C15 120.32(16) . . ?
C17 C16 H16 119.8 . . ?
C15 C16 H16 119.8 . . ?
C16 C17 C15 119.21(18) . 2_577 ?
C16 C17 H17 120.4 . . ?
C15 C17 H17 120.4 2_577 . ?
C19 O18 Zn 111.03(14) . . ?
O20 C19 O18 122.82(18) . . ?
O20 C19 C21 121.44(17) . . ?
O18 C19 C21 115.7(2) . . ?
C23 C21 C22 119.03(18) . . ?
C23 C21 C19 120.37(17) . . ?
C22 C21 C19 120.6(2) . . ?
C21 C22 C23 120.1(2) . 2_666 ?
C21 C22 H22 119.9 . . ?
C23 C22 H22 119.9 2_666 . ?
C21 C23 C22 120.82(19) . 2_666 ?
C21 C23 H23 119.6 . . ?
C22 C23 H23 119.6 2_666 . ?
C25 O24 H24 112(2) . . ?
O26 C25 O24 123.7(2) . . ?
O26 C25 C27 123.0(2) . . ?
O24 C25 C27 113.3(2) . . ?
C28 C27 C29 119.2(2) . 2_576 ?
C28 C27 C25 121.7(2) . . ?
C29 C27 C25 119.1(2) 2_576 . ?
C27 C28 C29 120.2(2) . . ?
C27 C28 H28 119.9 . . ?
C29 C28 H28 119.9 . . ?
C28 C29 C27 120.6(2) . 2_576 ?
C28 C29 H29 119.7 . . ?
C27 C29 H29 119.7 2_576 . ?
 
loop_
 _geom_hbond_atom_site_label_D
 _geom_hbond_atom_site_label_H
 _geom_hbond_atom_site_label_A
 _geom_hbond_distance_DH
 _geom_hbond_distance_HA
 _geom_hbond_distance_DA
 _geom_hbond_angle_DHA
 _geom_hbond_site_symmetry_A
O24 H24 O20  0.82(3) 1.83(3) 2.644(2) 168(3) 2_566
 
_diffrn_measured_fraction_theta_max    0.999
_diffrn_reflns_theta_full              27.60
_diffrn_measured_fraction_theta_full   0.999
_refine_diff_density_max    0.375
_refine_diff_density_min   -0.352
_refine_diff_density_rms    0.058
#===END
